# Supplementary material for: Sample Preparation Strategies for Antibody-Free Quantitative Analysis of High Mobility Group Box 1 Protein
Source: Pharmaceuticals (Basel). 2021 Jun 3;14(6):537. doi: 10.3390/ph14060537 (PMC8230321; doi:10.3390/ph14060537)
Supplement: Supplementary file 1 [file pharmaceuticals-14-00537-s001.zip › pharmaceuticals-1248408-supplementary.pdf]

## ***Supplementary Methods***

### *Immunoprecipitation with Anti-HMGB1 and Anti-Haptoglobin Antibodies*

Dynabeads® M-280 tosylactivated (Invitrogen, Carlsbad, CA, USA), 5 mg, was coupled to 50 µg anti-HMGB1 antibodies or 100 µg anti-Haptoglobin antibodies (prepared as described in Materials and Methods) overnight, according to the manufacturer's protocol. The resulting bead concentration was 20 mg/mL. For the anti-HMGB1 antibody assay, 50 µL of the coated bead solution was added to 250 µL of the sample, and incubated with rotation for 1 h at RT. Subsequently, the beads were washed once with 200 µL phosphate-buffered saline (PBS) w/0.05% Tween, once with 200 µL PBS, once with 10 mM Tris-HCl (pH 7.4), and finally with 200 µL ammonium bicarbonate (AMBIC) 100 mM following Levernæs et al. [1], with minor modifications. The beads were then resuspended in 20 µL of 100 mM AMBIC before on-bead trypsin digestion as described above, but with iodoacetamide (IAA) as the alkylation reagent.

For the anti-haptoglobin assay, samples were prepared by adding recombinant dsHMGB1 to plasma, followed by incubation for 30 min at 37 °C, as described by Yang et al. [2]. The samples were diluted 1:40 with PBS, and 50 µL of the coated bead solution was then added to 200 µL of the diluted sample, and incubated with mixing at 37 °C. The beads were then washed three times with 1 mL Buffer E from Invitrogen, before eluting the captured proteins by adding 50 µL of 200 mM glycine (pH 2.6), vortexing, and 5 min incubation. This was repeated three times, yielding a total of 150 µL eluate. Tris-HCl (50 µL, 1 M, pH 7.5) was added to neutralize the sample.

### *Precipitation with Perchloric Acid (PCA), Followed by Filter-Aided Sample Preparation (FASP)*

PCA (13.7% w/w) was prepared as described by Gaillard et al. [3], as follows: 1.26 vol of 70% PCA was added to 8.96 vol of water. Then, 185 µL plasma, spiked with 1 µg recombinant HMGB1, was added to 15 µL of 5 M NaCl and 100 µL of 13.7% PCA to obtain a final concentration of 5% PCA. The sample was vortexed for 10 s, incubated on ice for 10 min, and centrifuged for 10 min at 15000 ×g at 4 °C. The supernatant was transferred to a 5 kDa MW cut-off filter (Ultrafree®-MC, Millipore, Bedford, MA, USA). The filter was assembled with a sample tube, and centrifuged for 40 min at 5000 ×g at RT. Addition of 200 µL AMBIC for washing, followed by 40 min of spinning at 5000 ×g at RT, was repeated until pH > 7 was attained.

Subsequently, FASP was performed as follows: proteins retained on the filter were reduced by adding 30 µL of 30 mM DL-dithiothreitol (DTT), and 30 min incubation at RT, followed by the addition of 30 µL of 90 nM N-ethylmaleimide (NEM) for 10 min at RT. The proteins were digested with 30 µL of 0.25 mg/mL trypsin with 20 mM CaCl<sub>2</sub> overnight at 37 °C. The filter was then transferred to a clean sample tube, and centrifuged for 2 min at 1000 ×g. Trifluoroacetic acid (TFA) (1 µL) and acetonitrile (ACN) (5 µL) were subsequently added to the sample.

### *Digestion of Proteins with Acetic Acid*

The method for digestion using acetic acid is described in a patent [4]. Recombinant HMGB1 (10 µL, 200 µg/mL), neat or spiked, was analyzed in a total volume of 200 µL plasma, at a concentration of 10 µg/mL. DTT (10 µL, 200 mM) was added for 10 min, followed by 10 µL of 120 mM NEM for 10 min. Subsequently, 33 µL or 66 µL of 100% acetic acid, and 157 µL or 154 µL water were added, respectively, resulting in 15% acetic acid in the sample. Incubation for 2 h at 110 °C digested the proteins before separation by high performance liquid chromatography (HPLC).

### *Separation of Acid-Digested Proteins with HPLC*

The digested samples were injected into the HPLC system, equipped with a UV detector, and fraction collector described earlier. The sample (100 µL) was separated with an Inertsil ODS-4 C18 column, 21 × 150 mm (GL Sciences, Eindhoven, The Netherlands) at 45 °C. A gradient was run with solvent A (0.1% TFA) and solvent B (ACN) at a flow rate of 0.2 mL/min, as follows: 1–60% ACN for 1–40 min, 60–70% for 40–45 min, and 70% ACN for 45–50 min. The UV detector was set at 280 nm. Several fractions were collected in conical 1.5 mL PP-tubes, initially between 3.75–33 min, and in later experiments, every two minutes between 17.8–25.8 min.

The fractions were dried using a miVac concentrator with Speed Trap (Genevac Ltd., Ipswich, UK) at 80 °C for 1 h. For analysis of acid-digested peptides, the dried peptides were resuspended in FA and analyzed using HRMS. Otherwise, the peptides were resuspended in 130 µL of 80% Tris-HCl and 20% ACN, and digested with 20 µL of 0.5 mg/mL trypsin with 200 mM CaCl<sub>2</sub> at 37 °C for 1 h. The samples were evaporated to dryness at 80 °C for 30 min, and resolved in 25 µL of 1% FA before HRMS analysis.

### *References*

1. Levernæs, M.C.S.; Broughton, M.N.; Reubsaet, L.; Halvorsen, T.G. To elute or not to elute in immunocapture bottom-up LC-MS. *J Chromatogr B Analyt Technol Biomed Life Sci* **2017**, *1055-1056*, 51-60, doi:[10.1016/j.jchromb.2017.03.044](https://doi.org/10.1016/j.jchromb.2017.03.044).
2. Yang, H.; Wang, H.; Levine, Y.A.; Gunasekaran, M.K.; Wang, Y.; Addorisio, M.; Zhu, S.; Li, W.; Li, J.; de Kleijn, D.P.V.; Olofsson, P.S.; Warren, H.S.; He, M.; Al-Abed, Y.; Roth, J.; Antoine, D.J.; Chavan, S.S.; Andersson, U.; Tracey, K.J. Identification of CD163 as an antiinflammatory receptor for HMGB1-haptoglobin complexes. *JCI Insight* **2016**, *1*, doi:[10.1172/jci.insight.85375](https://doi.org/10.1172/jci.insight.85375).
3. Gaillard, C.; Borde, C.; Gozlan, J.; Maréchal, V.; Strauss, F. A high-sensitivity method for detection and measurement of HMGB1 protein concentration by high-affinity binding to DNA hemicatenanes. *PLoS One* **2008**, *3*, e2855, doi:[10.1371/journal.pone.0002855](https://doi.org/10.1371/journal.pone.0002855).
4. Kwon, J.; Lee, T. Protein cleavage at aspartic acid using chemical reagents. WO2006031063A1, **2006**.

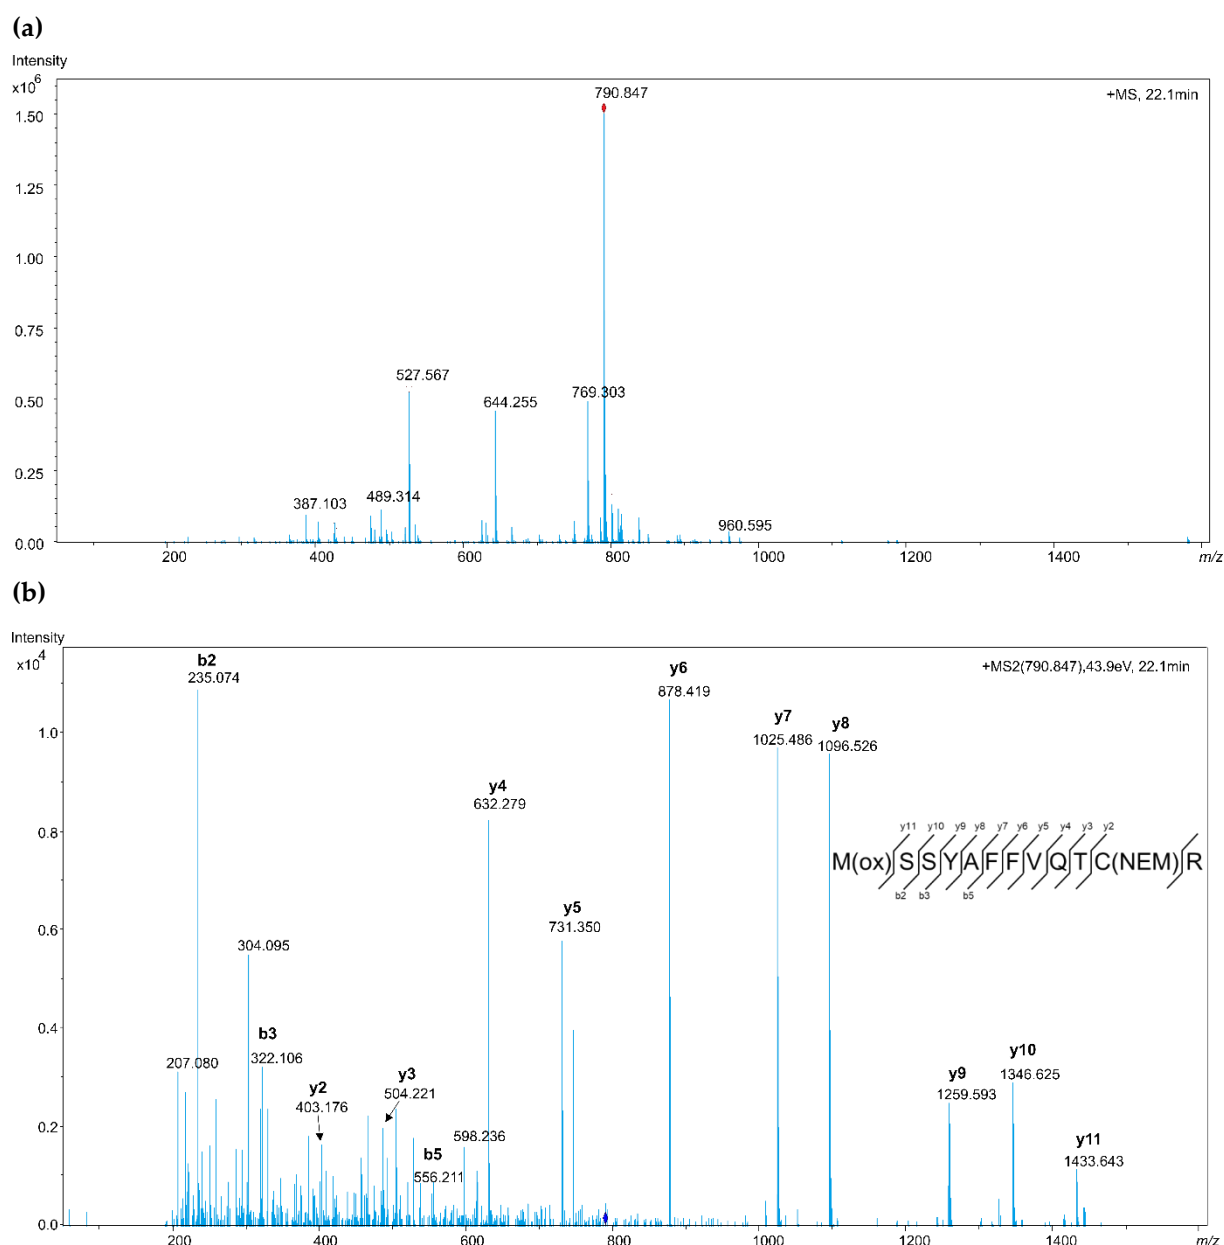

### Supplementary Figure S1

Mass spectrum from high resolution mass spectrometry (HRMS), identifying high mobility group box 1 (HMGB1) peptide MSSYAFFVQTCR alkylated with N-ethylmaleimide (NEM) and with oxidized methionine (M(ox)) (a) Molecular ion mass spectrum showing the peptide mass  $[M+2H]^{2+}$  with  $m/z$  790.847, at 22.1 min. (b) Fragment ion mass spectrum of  $m/z$  790.847 showing series of y- and b-ions identifying the amino acid sequence.

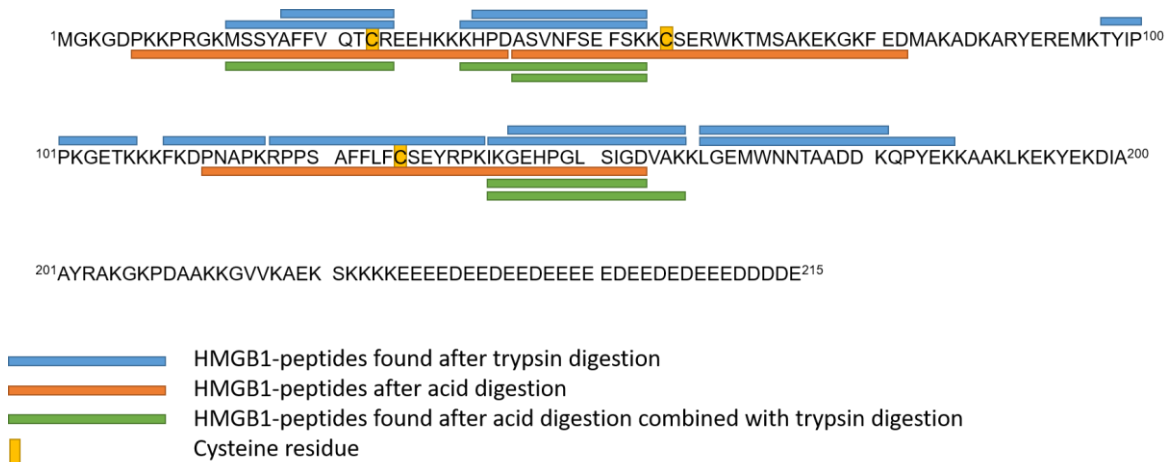

### Supplementary Figure S2

The amino acid sequence for high mobility group box 1 (HMGB1) protein with the peptides found using different digestion methods.

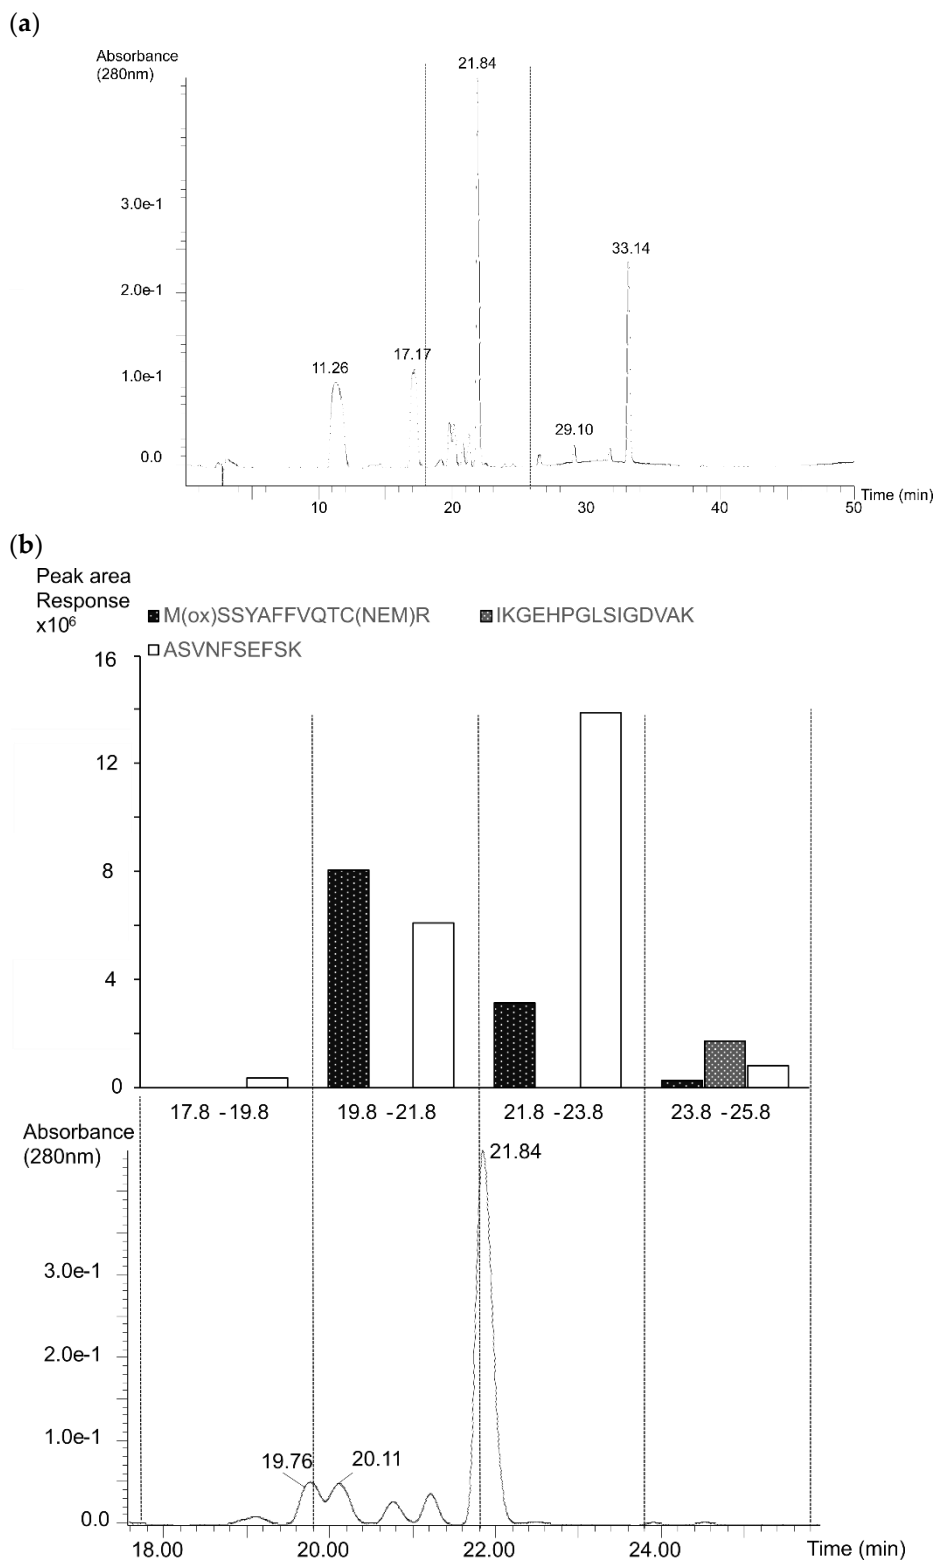

### Supplementary Figure S3

High performance liquid chromatography (HPLC) separation of acid digested high mobility group box 1 (HMGB1). (a) Chromatogram from HPLC. Peptides from HMGB1 were mainly found in the fraction eluted between 17.8 min and 25.8 min. (b) Peak area response for four different HMGB1 peptides in the 2-min-fractions between 17.8 min and 25.8 min.
